# Supplementary material for: A facile theragnostic nano-platform for the effective treatment and real-time imaging of acute liver injury
Source: Royal Society of Chemistry journal article supplement (doi:10.1039/d3bm00249g), 2023-01-01
Supplement: d3bm00249g1.pdf [file d3bm00249g1.pdf]

## Table of Content

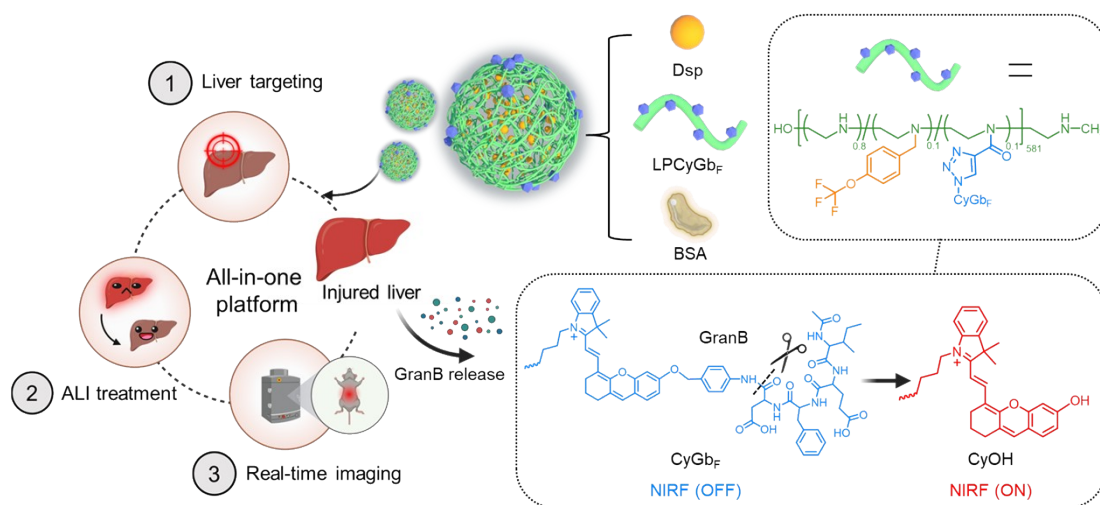

A facile nanoplatform loaded with dexamethasone sodium phosphate and protease responsive probe realizes liver targeting, acute liver injury treatment and real-time imaging.
