# Supplementary material for: A facile theragnostic nano-platform for the effective treatment and real-time imaging of acute liver injury
Source: Royal Society of Chemistry journal article supplement (doi:10.1039/d3bm00249g), 2023-01-01
Supplement: d3bm00249g2.pdf [file d3bm00249g2.pdf]

## Supporting Information

### **A facile theragnostic nano-platform for effective treatment and real-time imaging of acute liver injury**

Huixin Li<sup>1, 2</sup>, Kai Hao<sup>3</sup>, Jiayan Wu<sup>1, 2</sup>, Chaoliang He<sup>1, 2</sup>, Shasha He<sup>3, 4\*</sup>, Huayu Tian<sup>1, 2, 3, 4\*</sup>, Xuesi Chen<sup>1, 2</sup>

<sup>1</sup>Key Laboratory of Polymer Ecomaterials, Changchun Institute of Applied Chemistry, Chinese Academy of Sciences, Changchun 130022, China

<sup>2</sup>University of Science and Technology of China, Hefei 230026, China

<sup>3</sup>State Key Laboratory of Physical Chemistry of Solid Surfaces, College of Chemistry and Chemical Engineering, Xiamen University, Xiamen 361005, China

<sup>4</sup>Tan Kah Kee Innovation Laboratory, Xiamen 361102, China

Corresponding author E-mail: thy@xmu.edu.cn (Huayu Tian); hss@xmu.edu.cn (Shasha He)

The file includes:

Figs. S1 to S8

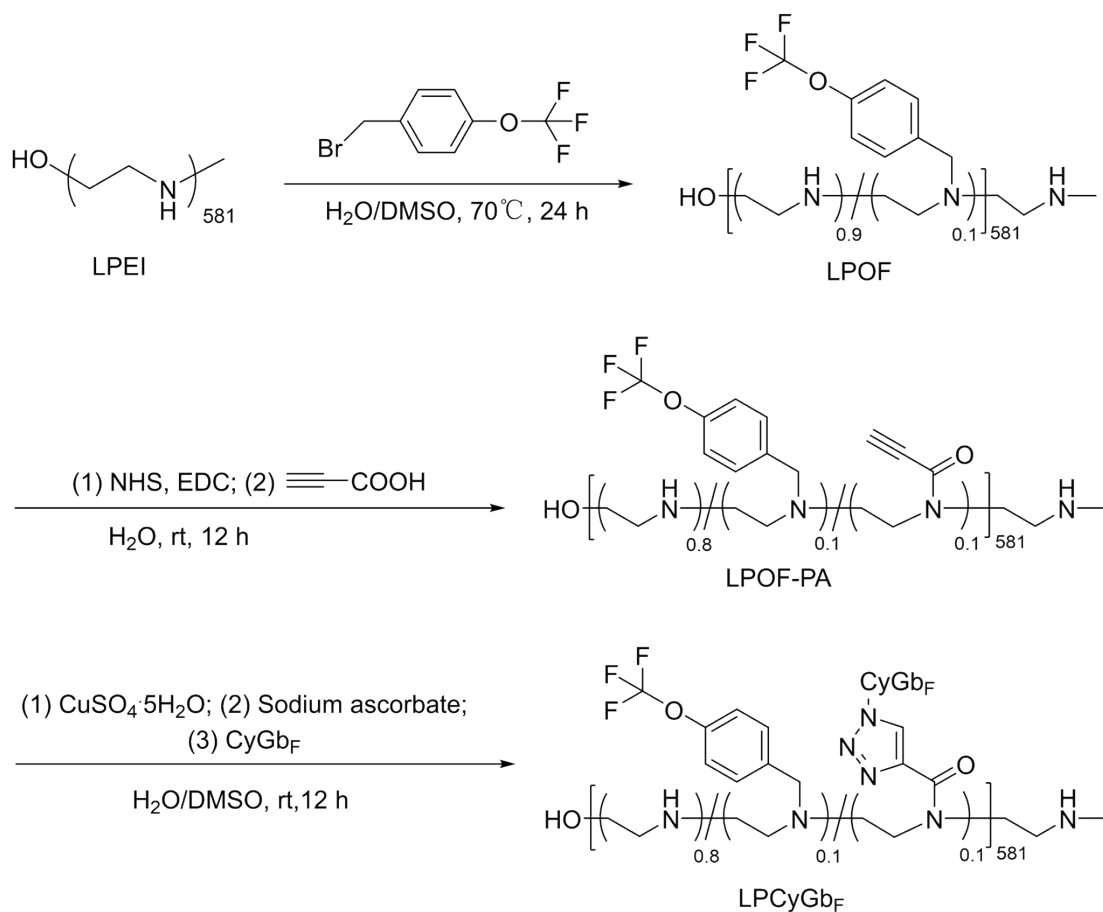

**Figure S1** The synthesis route of LPCyGb<sub>F</sub>.

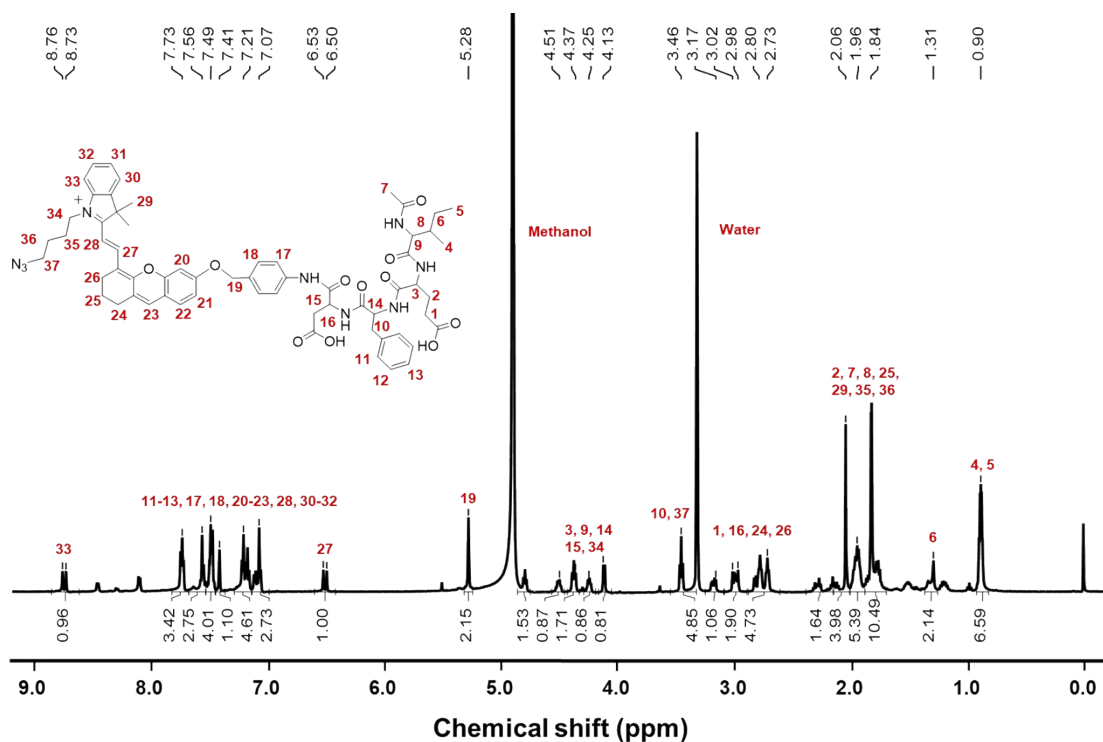

**Figure S2** <sup>1</sup>H NMR spectrum of CyGb<sub>F</sub> in MeOD.

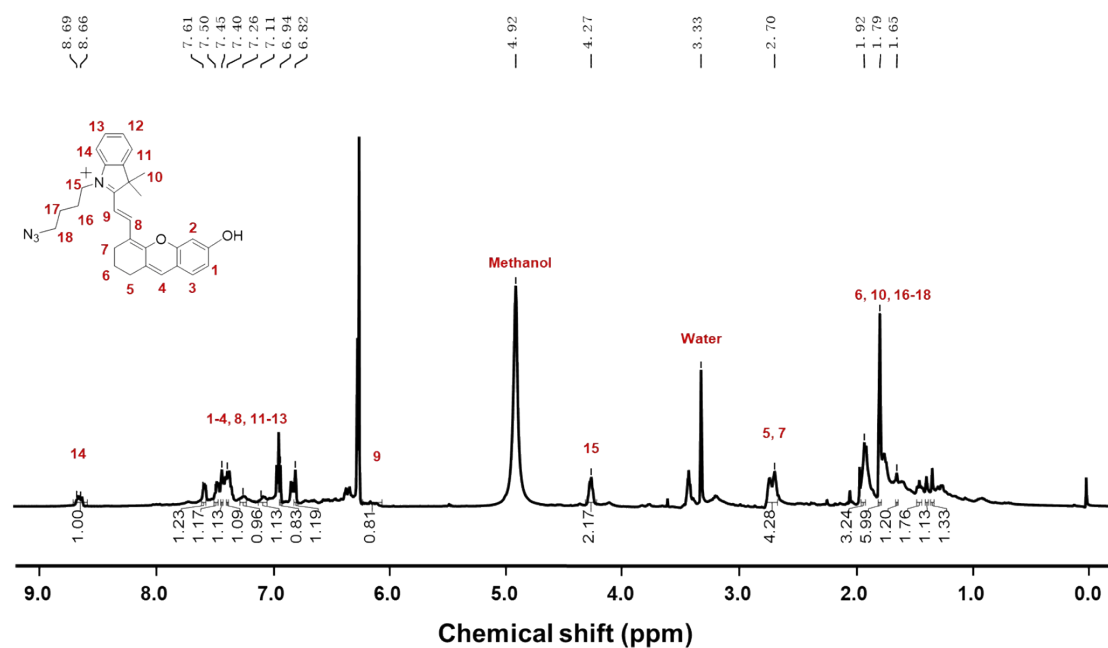

Figure S3  $^1\text{H}$  NMR spectrum of CyOH in MeOD.

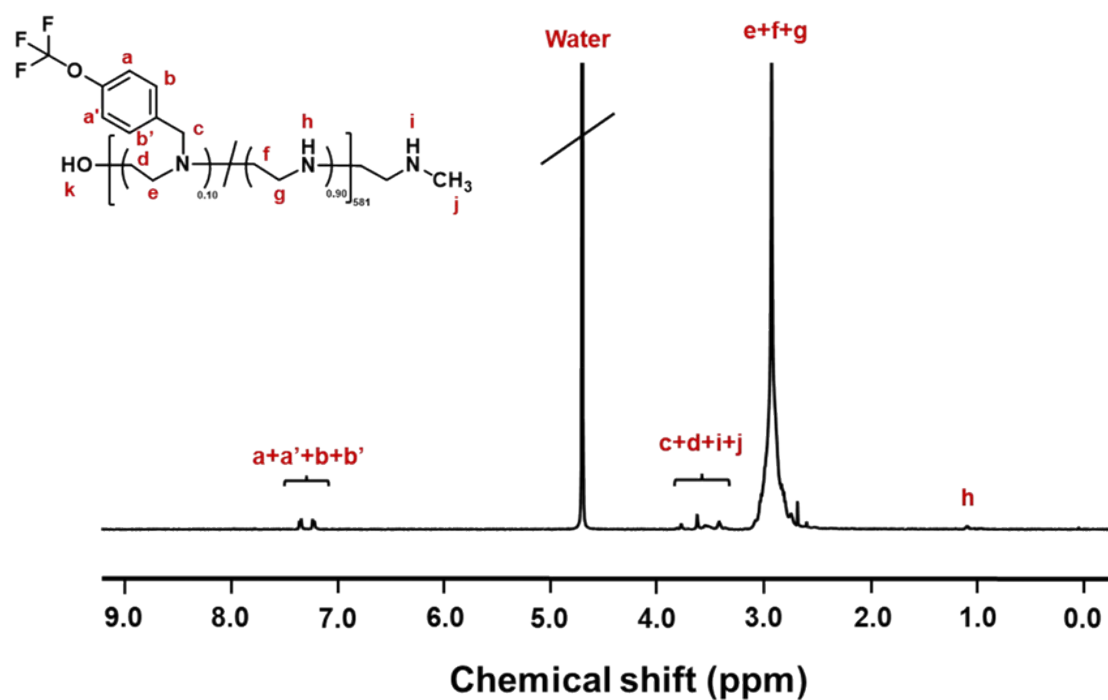

Figure S4  $^1\text{H}$  NMR spectrum of LPOF in  $\text{D}_2\text{O}$ .

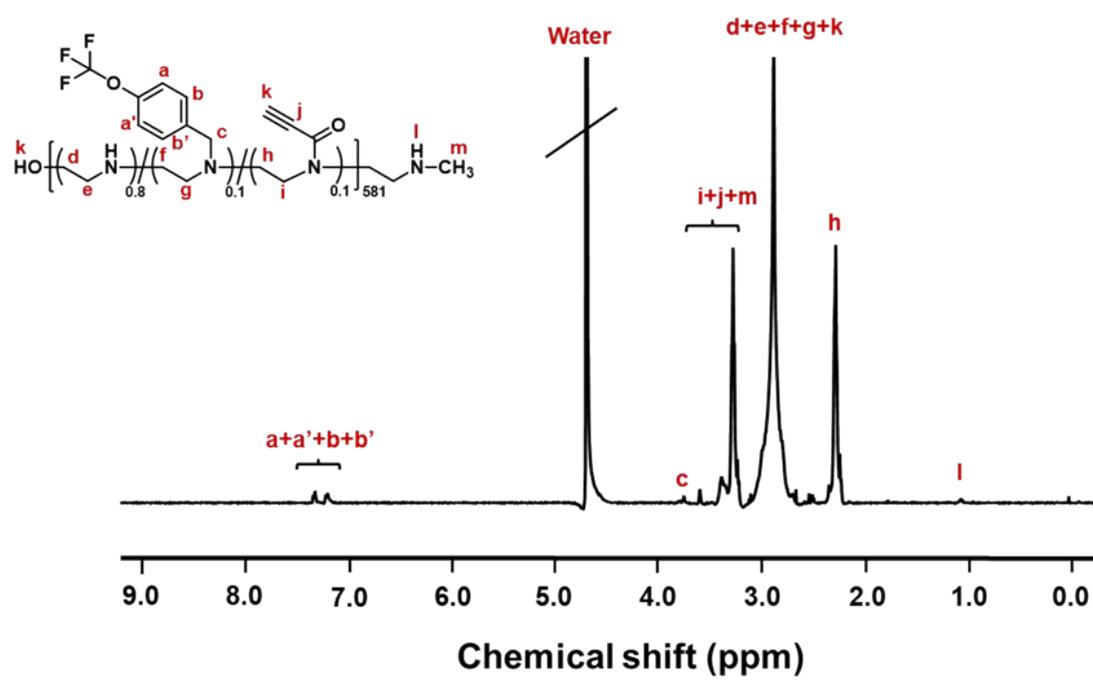

Figure S5  $^1\text{H}$  NMR spectrum of LPOF-PA in  $\text{D}_2\text{O}$ .

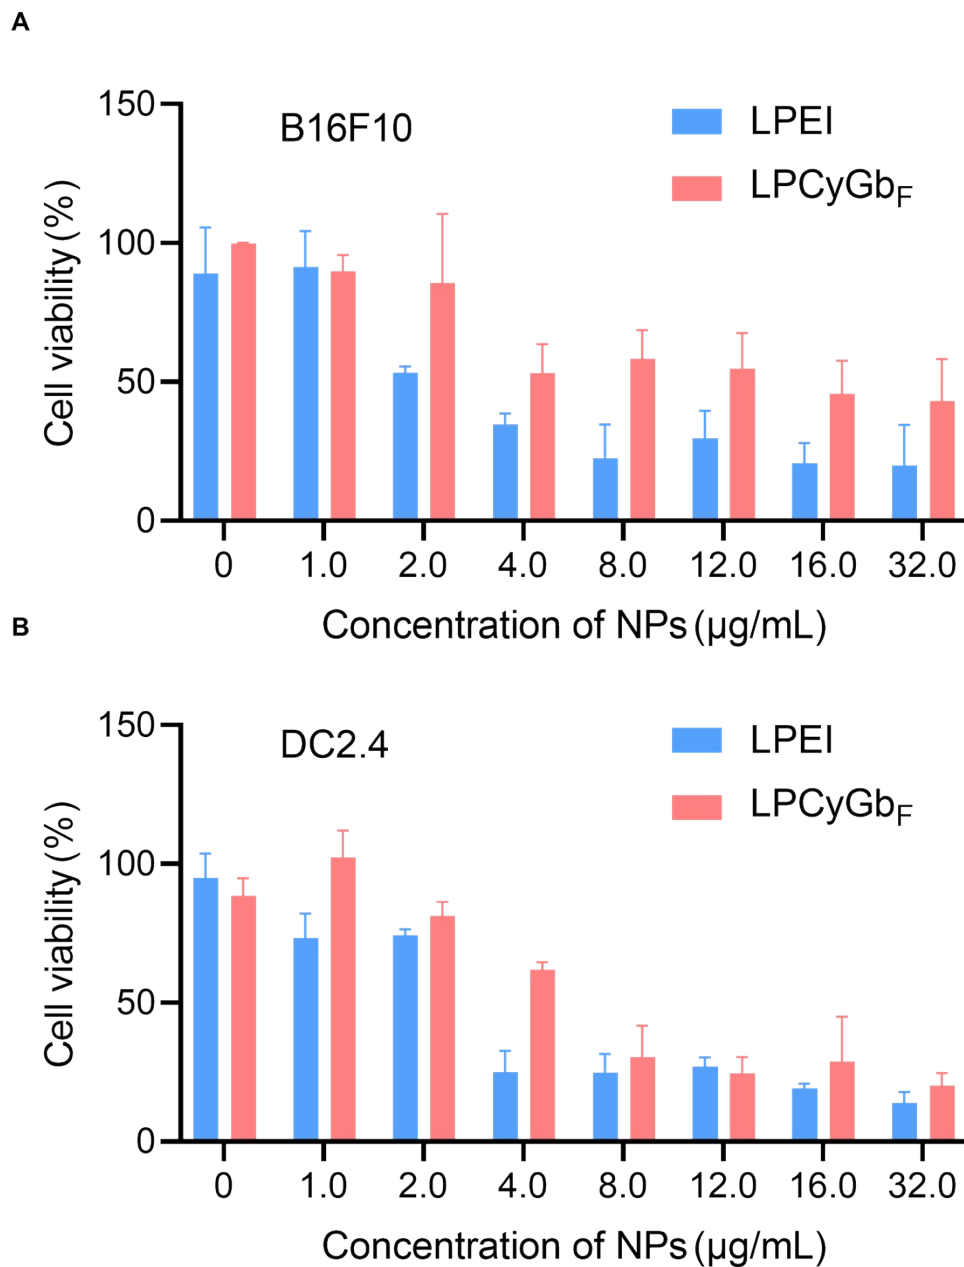

**Figure S6** Cell viability of B16F10 cells (A) and DC2.4 cells (B) after treatment with LPEI and LPCyGb<sub>F</sub> at different concentration from 0 to 32.0  $\mu\text{g/mL}$ .

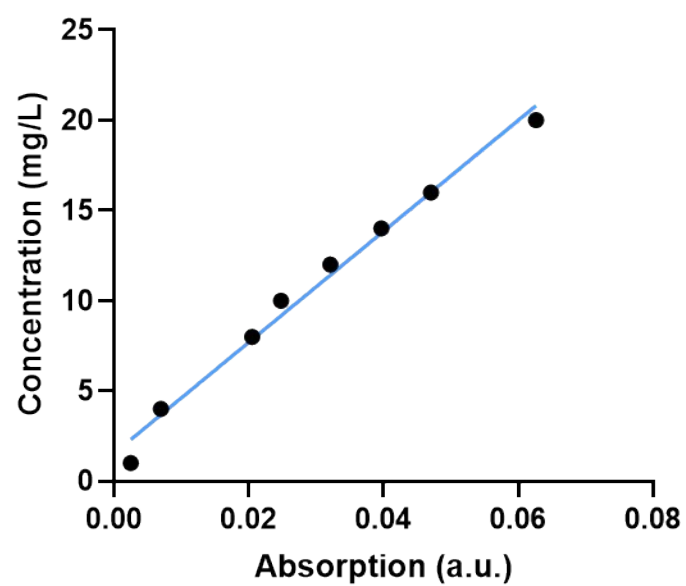

**Figure S7** The standard curve of dexamethasone sodium phosphate (Dsp).

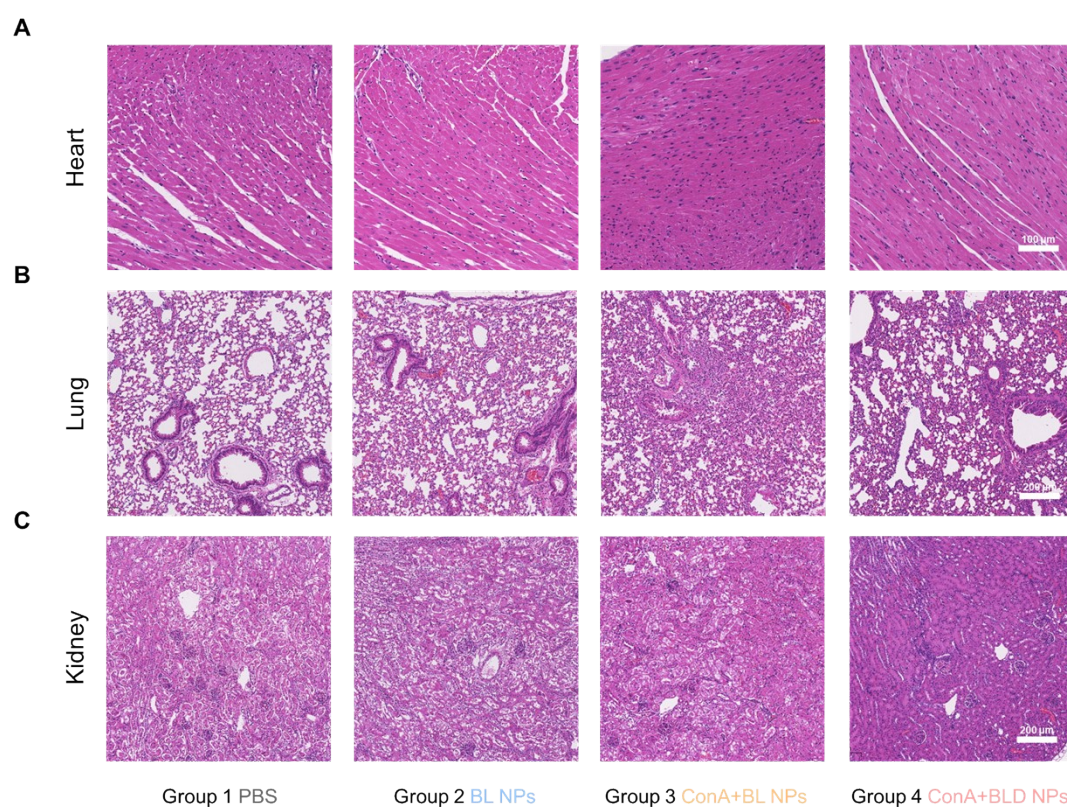

**Figure S8** Histopathology of hearts (A) (scale bar = 100  $\mu$ m), lungs (B) and kidneys (C) (scale bars=200  $\mu$ m).
